# Supplementary material
Source: HighWire-hosted journal article supplement (https://ez-admanager.com/highwire/filestream/161052/field_highwire_adjunct_files/0/Thomas_276.pdf)
Supplement: Thomas_276.pdf [file Thomas_276.pdf]

# <sup>123</sup>I-FP-CITドパミン作動性神経画像検査の レビー小体型認知症診断能に関する 剖検による検証

Autopsy validation of <sup>123</sup>I-FP-CIT dopaminergic neuroimaging for the diagnosis of DLB

Alan J. Thomas, PhD\*;  
Johannes Attems, MD\*;  
Sean J. Colloby, PhD\*;  
John T. O'Brien, DM;  
Ian McKeith, FMedSci\*;  
Rodney Walker, PhD;  
Lean Lee; David Burn, MD\*;  
Debra J. Lett, BA\*;  
Zuzana Walker, MD

\*Institute of Neuroscience,  
Newcastle University,  
Campus for Ageing and  
Vitality, Newcastle Upon  
Tyne, UK

Correspondence to  
Dr. Thomas:  
alan.thomas@ncl.ac.uk

**目的：**レビー小体型認知症 (DLB) の臨床診断において、剖検をゴールドスタンダードとして、<sup>123</sup>I-N-fluoropropyl-2β-carbomethoxy-3β-(4-iodophenyl) nortropine (<sup>123</sup>I-FP-CIT) SPECTによるドパミン作動性神経画像検査を検証する。

**方法：**研究において<sup>123</sup>I-FP-CIT画像検査を受けたことがあり、Newcastle Brain Tissue Resourceに脳組織を提供した60歳超の認知症患者を対象とした。全例が臨床研究のために定まった評価を受け、専門委員が国際診断基準を用いて臨床的に診断した。全例がベースライン時に<sup>123</sup>I-FP-CIT画像検査を受け、画像は盲検下の評価者が正常または異常と判定した。患者は前向き研究で検討され、死後、剖検により詳細に評価された。国際基準を用いて神経病理学的に診断した。

**結果：**患者55例 (DLB: 33例, アルツハイマー病: 22例) を対象とした。剖検による診断に対して、<sup>123</sup>I-FP-CITの診断精度は86% (感度80%, 特異度92%) であり、臨床所見による診断精度は79% (感度87%, 特異度72%) であった。DLB患者のうち10% (3例) は、レビー小体型病の病理学的基準を満たしていたが<sup>123</sup>I-FP-CIT画像検査の結果は正常であった。

**結論：**今回の剖検を用いた大規模な研究では、認知症における<sup>123</sup>I-FP-CIT画像検査は、DLBの有効で正確なバイオマーカーであることが示された。臨床診断に比べて特異性がより高く (20%)、この点は臨床的に重要である。今後、運動障害専門クリニックや一般診療を含めて、より多様な状況下で募集した患者を対象とし、本結果の再現性を確かめる必要がある。<sup>123</sup>I-FP-CITスキャン画像の異常所見はレビー小体型病を強く支持する一方、正常所見であるからといって、わずかな脳幹病変を伴うDLBを除外することはできない。

**エビデンスの分類：**本研究は、<sup>123</sup>I-FP-CITドパミン作動性神経画像検査によりDLB患者を正確に特定できるという、クラスIのエビデンスを提供する。

Neurology® 2017; 88: 276-283

図1 臨床診断と剖検および<sup>123</sup>I-FP-CIT画像検査所見との関係を示すフローチャート

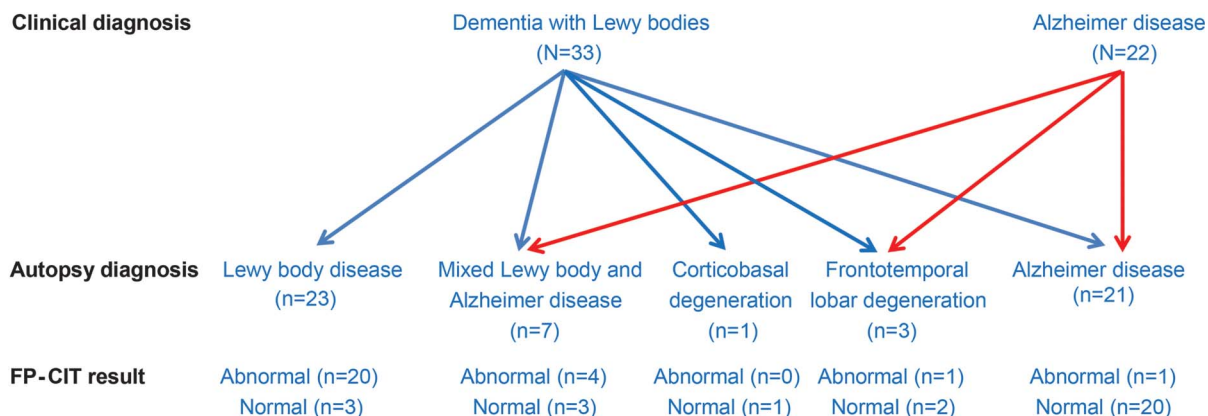

<sup>123</sup>I-FP-CIT = <sup>123</sup>I-N-fluoropropyl-2b-carbomethoxy-3b-(4-iodophenyl) nortropane

図2 <sup>123</sup>I-FP-CIT陽性・偽陰性・偽陽性の典型例における顕微鏡写真

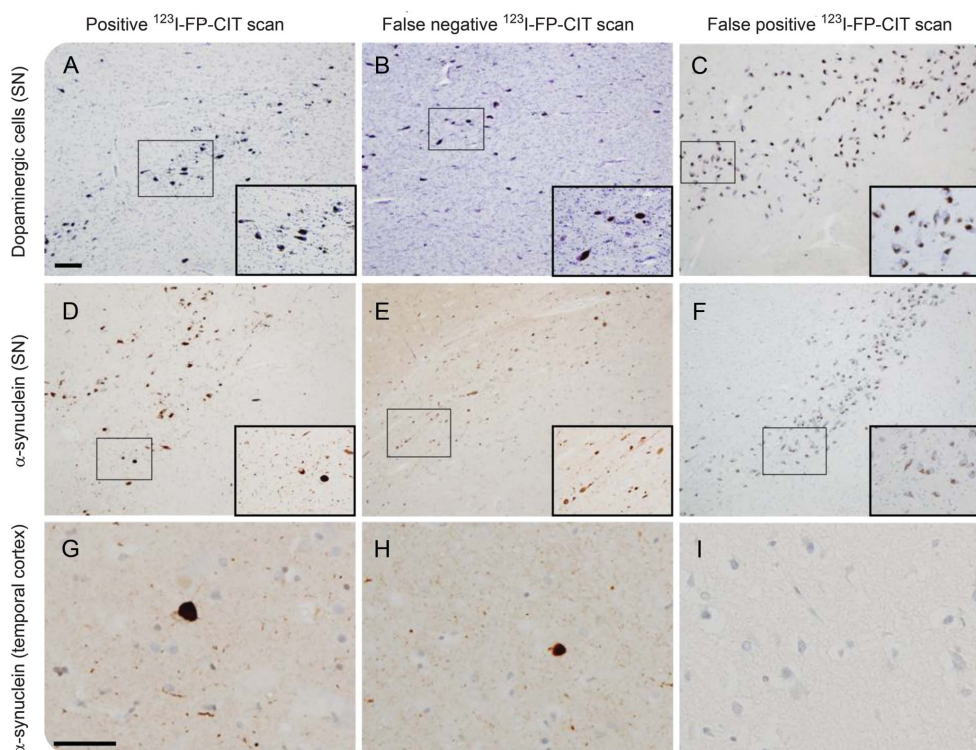

レビー小体型認知症 (DLB) の臨床所見がみられ、<sup>123</sup>I-N-fluoropropyl-2b-carbomethoxy-3b-(4-iodophenyl) nortropane (<sup>123</sup>I-FP-CIT) スキャン画像で異常 (陽性) 所見が認められた1症例の顕微鏡写真。黒質 (SN) ではドパミン作動性神経細胞の消失が顕著であり (A), SN (D) と側頭皮質 (G) にはレビー小体が見られる。DLBの臨床所見および病理学的所見がみられ、<sup>123</sup>I-FP-CITスキャン画像で偽陰性所見が認められた1症例。SNには軽度の細胞消失 (B) と軽度の $\alpha$ -シヌクレイン病変 (E), 側頭皮質には中等度の $\alpha$ -シヌクレイン病変がみられるのみである (H)。アルツハイマー病の臨床所見および病理学的所見がみられ、<sup>123</sup>I-FP-CITスキャン画像で偽陽性所見が認められた1症例。SNではドパミン作動性神経細胞の消失は実質的にみられず (C), SN (F) と側頭皮質 (I) に $\alpha$ -シヌクレイン病変はみられない。(A) ~ (F) のスケールバーは200  $\mu$ m。(G) ~ (I) のスケールバーは50  $\mu$ m。ドパミン作動性ニューロンにはクレシルファストバイオレット染色を用いた。 $\alpha$ -シヌクレインの免疫組織化学染色には、Novocastraの抗体 (1 : 200に希釈) を、対比染色としてヘマトキシリンを用いた。
